# Supplementary material for: A general strategy to construct small molecule biosensors in eukaryotes
Source: eLife. 2015 Dec 29;4:e10606. doi: 10.7554/eLife.10606 (PMC4739774; doi:10.7554/eLife.10606)
Supplement: Supplementary file 1. — DOI: http://dx.doi.org/10.7554/eLife.10606.016 [file elife-10606-supp1.xlsx]

## Sheet: Sheet1
Supplementary Table 1. Oligonucleotides Used in this Study
Primer name	Sequence	Use
GDV_ePCR_fwd	CGCAAACACAAATACACACACTAATCTAGAACTAGTGGATCCACAAA	GDV ePCR library construction
GDV_ePCR_rev	GTAAGCGTGACATAACTAATTACATGACTCGAGGTCGACTTA	GDV ePCR library construction
GDVP16_L77F_rc	GTAAAGAATCCATTTTCAAAATCATGTCAAAGTCTTCTCGAGGAAAAATCAGTAG	GDV ePCR library clone single point mutations
GDVP16_E106D_rc	GACGGAGAGCGTGGACAACAATATCTTTAGCATTCATACCTCCTGAACC	GDV ePCR library clone single point mutations
GDVP16_L229P_rc	CTGCTTCCACACCGCCCGGTGGTTCCAGGACACGCA	GDV ePCR library clone single point mutations
GDVP16_I238N_rc	GCACTACCCGCGCCTTGAACATTTTTCGCAGCTGCTTCCACACC	GDV ePCR library clone single point mutations
GDVP16_S244G_rc	CGCGCGGCTGTACGCACCACCCGCGCCTTGAACAATTTTC	GDV ePCR library clone single point mutations
GDVP16_A286T_rc	CAGTCTGCGCGTGTGTCCCGTGGGGAGAAAGGACAGGC	GDV ePCR library clone single point mutations
GDVP16_R60S_rc	ATAGCTGTTCCAGTCTTTCTAGACTTGATTCCACTTCTGTCAGATG	GDV ePCR library clone single point mutations
GDVP16_L292V_rc	GTCGGGGGGGCCGTCGACACTCTGCGCGTGTGTCCCGCGGGGA	GDV ePCR library clone single point mutations
GDVP16_F219Y_rc	CAGGACACGCAGCGGGTTGAAATAGAGACGGTACAGCAGAATCTG	GDV ePCR library clone single point mutations
GDVP16_H307N_rc	CATCGCCACGTCCTCGCCGTCTAAGTTGAGCTCGTCCCCCAGGCTGAC	GDV ePCR library clone single point mutations
GDVP16_D354V_rc	CATCGGTAAACATCTGCTCAAACTCGAAGACGGCCATATCCAGAGCGCCGTAG	GDV ePCR library clone single point mutations
Gal4_DIG10.3_VP64_hr_fwd	GGATATAAAAGCATTGTTAGGAGGTTCTGGCGGTTCAGGAGGTATGAATGCTAAAGAAATTGTTGTCCACGC	Gibson cloning of DIG10.3 variants
Gal4_DIG10.3_VP64_hr_rev_rc	CTGAACCAAGCATATCTAAGTCAAAATCGTCTAAAGCATCACTACCCGCGCCTTGAACAATTTTC	Gibson cloning of DIG10.3 variants
Gal4 Pcyc1 Fwd	tacacacactaatctagaactagtggatccacaaaATGAAGCTACTGTCTTCTATCGAAC	Gibson cloning of Gal4 DBD
Gal4 Padh Fwd	caagctggccgctctagaactagtggatccacaaaATGAAGCTACTGTCTTCTATCGAAC	Gibson cloning of Gal4 DBD
Gal4 Ptef Fwd	TAATCTAAGTTTTCTAGAACTAGTGGATCCacaaaATGAAGCTACTGTCTTCTATCGAAC	Gibson cloning of Gal4 DBD
Gal4 (+linker) Rev	aagcttacctcctgaaccgccagaacctccTAACAATGCTTTTATATCCTGTAAAGAATC	Gibson cloning of Gal4 DBD
VP64 Fwd	gaagcagctgcgaaaattgttcaaggcgcgggtagtGATGCTTTAGACGATTTTGACTTAGATA	Gibson cloning of VP64 TAD
VP64 Rev	acataactaattacatgactcgaggtcgacttaGCCTAGCATATCTAGATCAAAGTCA	Gibson cloning of VP64 TAD
VP16 Fwd	gaagcagctgcgaaaattgttcaaggcgcgggtagtGCGTACAGCCGCGCGCGT	Gibson cloning of VP16 TAD
VP16 Rev	acataactaattacatgactcgaggtcgacttaCCCACCGTACTCGTCAATTCC	Gibson cloning of VP16 TAD
deg1 Fwd	aataaaatacccattaaagaccttttaaatcc	Gibson cloning of Mata2 degron
deg1 Rev	AATCTTACGGTTTTTGTTGGCCCT	Gibson cloning of Mata2 degron
LexA Fwd	TACACACACTAATCTAGAACTAGTGGATCCACAAAATGAAAGCGTTAACGGCCAGGC	Gibson cloning of LexA DBD
LexA Rev	ATTCATACCTCCTGAACCGCCAGAACCTCCCACCTTTCTCTTTTTCTTGGG	Gibson cloning of LexA DBD
B42 Fwd	GCTGCGAAAATTGTTCAAGGCGCGGGTAGTATCAATAAAGATATCGAGGAGTGC	Gibson cloning of B42 TAD
B42 Rev	acataactaattacatgactcgaggtcgacttaATCTCCACTCAGCAAGAGGCT	Gibson cloning of B42 TAD
Pgal1 Fwd	ccctcactaaagggaacaaaagctg	Gibson cloning of GAL1 promoter reporter plasmid
Pgal1 (yEGFP) Rev	CTTTAGACATtttgtGGATCCACTAGTTCTAGAATCCGG	Gibson cloning of GAL1 promoter reporter plasmid
Pgal1 (Fluc) Rev	gtttttggcgtcttcCATTTTGTCCCGGGGGATCCAC	Gibson cloning of GAL1 promoter reporter plasmid
PlexA Fwd	cctcactaaagggaacaaaagctgGAGCTCGAATTCGACAGGTTATCAGCAACA	Gibson cloning of LexA promoter reporter plasmid
PlexA Rev	GGGATCCACTAGTTCTAGAATCCGGGGTTTTTTCTCCTTGACGTTAAAGTATAG	Gibson cloning of LexA promoter reporter plasmid
yEGFP Fwd	AGAACTAGTGGATCCacaaaATGTCTAAAGGTGAAGAATTATTCACTGG	Gibson cloning of yEGFP reporter plasmid
yEGFP Rev	TGACTCGAGGTCGACTTATTTGTACAATTCATCCATACCATGGG	Gibson cloning of yEGFP reporter plasmid
Fluc Fwd	atcccccgggacaaaATGGAAGACGCCAAAAACATAAAGAAAG	Gibson cloning of firefly luciferase reporter plasmid
Fluc Rev	tgactcgaggtcgacTTACACGGCGATCTTTCCGCCC	Gibson cloning of firefly luciferase reporter plasmid
Rep->pUG Fwd	cgccagctgaagcttcgtacgctgcaggtcgacTAGTACGGATTAGAAGCCGCCG	Gibson cloning of reporter gene into integrative plasmid
Rep->pUG Rev	acattatacgaagttatattaagggttgtcgacGGCCGCAAATTAAAGCCTTCGAG	Gibson cloning of reporter gene into integrative plasmid
DIG_fwd	ggaggttctggcggttcaggaggtATGAATGCTAAAGAAATTGTTGTCCAC	Gibson cloning of DIG10.3 genes
DIG_rev	ACTACCCGCGCCTTGAACAATTT	Gibson cloning of DIG10.3 genes
DIG10.3_N120G_rc	TTCCAGGACACGCAGCGGACCGAAAAAGAGACGGTACAGCAG	DIG destabilizing mutations (GDV construct)
DIG10.3_G17A_rc	CAGACCAACCACGGGCATCAGCATTTTCCAGCAGACGGAGAGC	DIG destabilizing mutations (GDV construct)
DIG10.3_R106S_rc	GAATCTGACCGTCGCGCGTAGACCAAACGGCAATATAATCGTACG	DIG destabilizing mutations (GDV construct)
DIG10.3_Y72A_rc	GTCCGGATCGGCGGTTTCCGCGAACTGGACATCCGTAAAGCG	DIG destabilizing mutations (GDV construct)
DIG10.3_Y36F_rc	GGTTTTATAGCCCGGCGGTGGGAACGGATATTCCAGCACGCCTTC	DIG destabilizing mutations (GDV construct)
DIG10.3_E83V_rev_rc	GTGAGAACACCGTCACCATGAAATACGCCGATTGCCAGGTCCGGA	DIG destabilizing mutations (GDV construct)
DIG10.3_I81F_E83V_rev_rc	GTGAGAACACCGTCACCATGAAATACGCCGAATGCCAGGTCCGGATCGGC	DIG destabilizing mutations (GDV construct)
DIG10.3_I81F_rev_rc	GAACACCGTCACCATGAAATTCGCCGAATGCCAGGTCCGGATCGGC	DIG destabilizing mutations (GDV construct)
DIG10.3_L97M_I102T_V104A_rev_rc	GTCGCGCGTACGCCAAGCGGCAGTATAATCGTACGCCATTTTACCGCCGCTTGC	DIG destabilizing mutations (GDV construct)
DIG10.3_P127S_rev_rc	GCTGCTTCCACACCGCCCAGGGATTCCAGGACACGCAGCGGGTTG	DIG destabilizing mutations (GDV construct)
DIG10.3_V104A_rev_rc	GACCGTCGCGCGTACGCCAAGCGGCAATATAATCGTACGCCAGTTTACCG	DIG destabilizing mutations (GDV construct)
DIG10.3_Y36H_rev_rc	GGTTTTATAGCCCGGCGGTGGGTGCGGATATTCCAGCACGCCTTCC	DIG destabilizing mutations (GDV construct)
DIG10.3_FFF_A92T_rc	CGCCAGTTTACCGCCGCTAGTGGTGAGAACACCGTCACC	Progesterone destabilizing mutations (GDV construct)
DIG10.3_FFF_A103S_R108K_rc	ACAGCAGAATCTGACCGTCTTTCGTACGCCAAACAGAAATGAAATCGAACGCCAGTTTAC	Progesterone destabilizing mutations (GDV construct)
DIG10.3_FFF_A103S_rc	TCGCGCGTACGCCAAACAGAAATGAAATCGAACGCCAGTTTAC	Progesterone destabilizing mutations (GDV construct)
DIG10.3_FFF_E15G_rc	CCACGGGCATCGCCATTACCCAGCAGACGGAGAGCG	Progesterone destabilizing mutations (GDV construct)
DIG10.3_FFF_E60G_rc	CATCCGTAAAGCGGATGGTCATATAACCCGGGAACAGACGCATGTGC	Progesterone destabilizing mutations (GDV construct)
DIG10.3_FFF_F101I_rc	CGTACGCCAAACGGCAATAATATCGAACGCCAGTTTACCG	Progesterone destabilizing mutations (GDV construct)
DIG10.3_FFF_F119Y_rc	CAGGACACGCAGCGGGTTATAAAAGAGACGGTACAGCAGAATC	Progesterone destabilizing mutations (GDV construct)
DIG10.3_FFF_H9R_E15G_rc	CCACGGGCATCGCCATTACCCAGCAGACGGAGAGCACGGACAACAATTTCTTTAGCATTC	Progesterone destabilizing mutations (GDV construct)
DIG10.3_FFF_H9R_rc	CCAGCAGACGGAGAGCACGGACAACAATTTCTTTAGCATTCAT	Progesterone destabilizing mutations (GDV construct)
DIG10.3_FFF_H54L_rc	ATATTCCGGGAACAGACGCATCAGCGCCCAAATCGTTTCGCG	Progesterone destabilizing mutations (GDV construct)
DIG10.3_FFF_I64F_rc	GAACTGGACATCCGTAAAGCGAAAGGTCATATATTCCGGGAACAG	Progesterone destabilizing mutations (GDV construct)
DIG10.3_FFF_K4R_rc	GAGAGCGTGGACAACAATTTCACGAGCATTCATACCTCCTGAACC	Progesterone destabilizing mutations (GDV construct)
DIG10.3_FFF_K96E_rc	GGCAATGAAATCGAACGCCAGTTCACCGCCGCTTGCGGTG	Progesterone destabilizing mutations (GDV construct)
DIG10.3_FFF_K96E_V104A_rc	GTCGCGCGTACGCCAAGCGGCAATGAAATCGAACGCCAGTTCACCGCCGCTTGCGGTG	Progesterone destabilizing mutations (GDV construct)
DIG10.3_FFF_K96M_rc	GGCAATGAAATCGAACGCCAGCATACCGCCGCTTGCGGTG	Progesterone destabilizing mutations (GDV construct)
DIG10.3_FFF_L114Q_F119Y_V124E_rc	CAGTGGTTCCAGTTCACGCAGCGGGTTATAAAAGAGACGGTATTGCAGAATCTGACCGTC	Progesterone destabilizing mutations (GDV construct)
DIG10.3_FFF_L114Q_rc	GGGTTGAAAAAGAGACGGTATTGCAGAATCTGACCGTCGC	Progesterone destabilizing mutations (GDV construct)
DIG10.3_FFF_R108K_rc	GTACAGCAGAATCTGACCGTCTTTCGTACGCCAAACGGCAATG	Progesterone destabilizing mutations (GDV construct)
DIG10.3_FFF_V104A_rc	GTCGCGCGTACGCCAAGCGGCAATGAAATCGAACGCC	Progesterone destabilizing mutations (GDV construct)
DIG10.3_FFF_V124E_rc	CGCCCAGTGGTTCCAGTTCACGCAGCGGGTTGAAAAAG	Progesterone destabilizing mutations (GDV construct)
DIG10.3_FFF_Y72C_rc	TCCGGATCGGCGGTTTCACAGAACTGGACATCCGTAAAGC	Progesterone destabilizing mutations (GDV construct)
oJF70	atacacttattttttttataacttatttaataataaaaatcataaatcataagaaattcgcgcggccgcttttgatcatttgtcgacTCA	DIG10.3 and DIG10.3FFF epPCR library R
oJF71	agagaccacatggtcttgttagaatttgttactgctgctggtattacccatggtatggatgaattgtacaaaggatccGGAGGTGGTAGC	DIG10.3 and DIG10.3FFF epPCR library F
oJF76	TGAgtcgacaaatgatcaaaagcggc	DIG10.3 and DIG10.3FFF epPCR library backbone R
oJF77	GCTACCACCTCCggatcctttgta	DIG10.3 and DIG10.3FFF epPCR library backbone F
oJF258	agcggttctaacactcttagaggaccgaaaaaaagtctgtatagcaatatt	DIG10.3FFF add DIG hits N120G R
oJF259	aatattgctatacagactttttttcggtcctctaagagtgttagaaccgct	DIG10.3FFF add DIG hits N120G F
oJF260	aatatttgcccatctctggtgctccatacagcaataaagtc	DIG10.3FFF add DIG hits R106S R
oJF261	gactttattgctgtatggagcaccagagatgggcaaatatt	DIG10.3FFF add DIG hits R106S F
oJF262	aatctgggtcagcagtttcagcgaattggacgtcggtaaatc	DIG10.3FFF add DIG hits Y72A R
oJF263	gatttaccgacgtccaattcgctgaaactgctgacccagatt	DIG10.3FFF add DIG hits Y72A F
oJF264	acaccgtctccatgaaacacacctatagctaaatctg	DIG10.3FFF add DIG hits E83V R
oJF265	cagatttagctataggtgtgtttcatggagacggtgt	DIG10.3FFF add DIG hits E83V F
oJF325	gcatCGTCTCATCGGTCTCATATGggctggtcatgcttagtga	Yeast cloning toolkit 3β-HSD part primer F
oJF326	atgccgtctcAggtctcAggatCCctgagtcttggattttaaagtttcct	Yeast cloning toolkit 3β-HSD part primer R
oJF384	ACCACCTAATATCTGGCTTTTTATTCAATAAAAACTCAAAAAAAAAAATCCAAAAAAAACTAAAAAACCAATAAAAATAAAAGATCTATG	3β-HSD pPAB1 epPCR library F
oJF385	TCATCACAAAATCTAGCAGAAAAACGGTAGTATTTATGTATATTCAAAAAAAAATCATTATCCTCATCAAGATTGCTTTATCTCGAGTTA	GGA universal epPCR R
oJF386	CATAGATCTTTTATTTTTATTGGTTTTTTAGTTTTTTTTGGATTTTTTTTTTTGAGTTTTTATTGAATAAAAAGCCAGATATTAGGTGGT	GGA4 iBB R
oJF387	TAACTCGAGATAAAGCAATCTTGATGAGGATAATGATTTTTTTTTGAATATACATAAATACTACCGTTTTTCTGCTAGATTTTGTGATGA	3β-HSD epPCR library backbone amplification F
oJF388	AAAATTCCATGAAGATGAGGCCAAGATTGTTTGGAAGAGATTGAAAAGAAGAAGAAGAAAAAAAGATAAAAGCAAATCAAAAGATCTATG	3β-HSD pPOP6 epPCR library F
oJF389	CATAGATCTTTTGATTTGCTTTTATCTTTTTTTCTTCTTCTTCTTTTCAATCTCTTCCAAACAATCTTGGCCTCATCTTCATGGAATTTT	3β-HSD pPOP6 backbone amplification R
oJF390	TTAGCTCCTTCGGTCCTCCG	GGA 3B-HSD universal piece 1 F
oJF391	GTAAGAGAATTATGCAGTGCTGCCA	GGA 3B-HSD universal piece 2 R
oJF392	CCATTGAAGTTGCTGGTCCAAATTCATATAAGGAAATAATACAAGATGGGCATGAAGAGGAACCTTTGGAGAATACGTGGCCAACGCCGT	GGA 3B-HSD piece 2 F N139D
oJF393	ACGGCGTTGGCCACGTATTCTCCAAAGGTTCCTCTTCATGCCCATCTTGTATTATTTCCTTATATGAATTTGGACCAGCAACTTCAATGG	GGA 3B-HSD piece 1 R N139D
oJF394	CAGAATAGGACCAAGCTTACAGTTTTAGAGGGGGATATATTGGATGAACCCTACTTAAAACGTGCATGTCAAGATGTTTCTGTCGTTATT	GGA 3B-HSD piece 2 F F67Y
oJF395	AATAACGACAGAAACATCTTGACATGCACGTTTTAAGTAGGGTTCATCCAATATATCCCCCTCTAAAACTGTAAGCTTGGTCCTATTCTG	GGA 3B-HSD piece 1 R F67Y
oJF396	CAACGTGACTTGGCTTATAAACCTTTATATAGTTGGGAAGAAGCCAGGCAAAAGACAGTTGAATGGGTGGGCTCTCTGGTCGATAGACAT	GGA 3B-HSD piece 2 F K349R
oJF397	ATGTCTATCGACCAGAGAGCCCACCCATTCAACTGTCTTTTGCCTGGCTTCTTCCCAACTATATAAAGGTTTATAAGCCAAGTCACGTTG	GGA 3B-HSD piece 1 R K349R
oJF398	GGCCAACGCCGTATCCGTACAGCAAAAAGTTAGCTGAAAAGGCCCTTTTGGCAGCTAACGGTTGGAATCTAAAGAATGGCGATACATTGT	GGA 3B-HSD piece 2 F V165L
oJF399	ACAATGTATCGCCATTCTTTAGATTCCAACCGTTAGCTGCCAAAAGGGCCTTTTCAGCTAACTTTTTGCTGTACGGATACGGCGTTGGCC	GGA 3B-HSD piece 1 R V165L
oJF228	ttctaacaatcttaatgcgcggacgacgatttccttagc	DIG10.3FFF hits deconvolution H9R R
oJF229	gctaaggaaatcgtcgtccgcgcattaagattgttagaa	DIG10.3FFF hits deconvolution H9R F
oJF230	ctggcgtcaccgtttcctaacaatcttaatgcgtgg	DIG10.3FFF hits deconvolution E15G R
oJF231	ccacgcattaagattgttaggaaacggtgacgccag	DIG10.3FFF hits deconvolution E15G F
oJF232	gtcggtaaatctgaatgtcatatattccggaaatagacgcat	DIG10.3FFF hits deconvolution I64F R
oJF233	atgcgtctatttccggaatatatgacattcagatttaccgac	DIG10.3FFF hits deconvolution I64F F
oJF234	caacttaccaccagaggtcgttaatacaccgtctc	DIG10.3FFF hits deconvolution A92T R
oJF235	gagacggtgtattaacgacctctggtggtaagttg	DIG10.3FFF hits deconvolution A92T F
oJF236	ggtaaatctgattgtcatatatcccggaaatagacgcatgtgtg	DIG10.3FFF hits deconvolution E60G R
oJF237	cacacatgcgtctatttccgggatatatgacaatcagatttacc	DIG10.3FFF hits deconvolution E60G F
oJF238	ggttctccatacagcaataatgtcaaaagccaacttaccac	DIG10.3FFF hits deconvolution F101I R
oJF239	gtggtaagttggcttttgacattattgctgtatggagaacc	DIG10.3FFF hits deconvolution F101I F
oJF240	taaagtcaaaagccaacataccaccagaggccgtt	DIG10.3FFF hits deconvolution K96M R
oJF241	aacggcctctggtggtatgttggcttttgacttta	DIG10.3FFF hits deconvolution K96M F
oJF242	ggattgaaaaaaagtctgtattgcaatatttgcccatctctgg	DIG10.3FFF hits deconvolution L114Q R
oJF243	ccagagatgggcaaatattgcaatacagactttttttcaatcc	DIG10.3FFF hits deconvolution L114Q F
oJF244	ggttctaacactcttagaggattataaaaaagtctgtatagcaatatttgcc	DIG10.3FFF hits deconvolution F119Y R
oJF245	ggcaaatattgctatacagacttttttataatcctctaagagtgttagaacc	DIG10.3FFF hits deconvolution F119Y F
oJF246	cacccagcggttctaactctcttagaggattgaaa	DIG10.3FFF hits deconvolution V124E R
oJF247	tttcaatcctctaagagagttagaaccgctgggtg	DIG10.3FFF hits deconvolution V124E F
oJF248	ccggaaatagacgcatgagtgcccatatggtttct	DIG10.3FFF hits deconvolution H54L R
oJF249	agaaaccatatgggcactcatgcgtctatttccgg	DIG10.3FFF hits deconvolution H54L F
oJF250	gggtcagcagtttcacagaattggacgtcggtaaatc	DIG10.3FFF hits deconvolution Y72C R
oJF251	gatttaccgacgtccaattctgtgaaactgctgaccc	DIG10.3FFF hits deconvolution Y72C F
oJF252	atctctggttctccatacactaataaagtcaaaagccaacttaccac	DIG10.3FFF hits deconvolution A103S R
oJF253	gtggtaagttggcttttgactttattagtgtatggagaaccagagat	DIG10.3FFF hits deconvolution A103S F
oJF254	caatatttgcccatctttggttctccatacagcaataaagtcaaaag	DIG10.3FFF hits deconvolution R108K R
oJF255	cttttgactttattgctgtatggagaaccaaagatgggcaaatattg	DIG10.3FFF hits deconvolution R108K F
oJF256	ggacgacgatttccctagcgttcatgctaccacc	DIG10.3FFF hits deconvolution K4R R
oJF257	ggtggtagcatgaacgctagggaaatcgtcgtcc	DIG10.3FFF hits deconvolution K4R F
ura3:INT:pUG6 Fwd	CACATGTGGATATCTTGACTGATTTTTCCATGGAGGGCACAGTTAAGCCGAACGCGGCCGCCAGCTGAAGCTTC	amplification of reporter gene + resistance cassette for integration at URA3 locus
ura3:INT:pUG6 Rev	GTTTTGCTGGCCGCATCTTCTCAAATATGCTTCCCAGCCTGCTTTTCTGTTAATACGACTCACTATAGGGAGACCGG	amplification of reporter gene + resistance cassette for integration at URA3 locus
PDR1KO:ura3 Fwd	aaaaaaggaaggaagtttttgagaacttttatctatacaaacgtatacgtcttccagtttcttggattcttttctgtatattcttggctgagatgaatagCGGTTTCTTTGAAATTTTTTTGATTCG	deletion of PDR1
PDR1KO:ura3 Rev	atattgtcgccagattatgcgtgcacagaaggccctcaatactaattgaaGGGTAATAACTGATATAATTAAATTGAAG	deletion of PDR1
PDR3KO:ura3 Fwd	cgacaactgcatcagcagttttattaattttttcttattgcgtgaccgcaaaacgcaaagaaaatagggaagcagagcataaccatagtaaatgggacacCGGTTTCTTTGAAATTTTTTTGATTCG	deletion of PDR3
PDR3KO:ura3 Rev	tgagtaactattcgaaacatcgaaaatgaatcatgtaaattttctatcaaGGGTAATAACTGATATAATTAAATTGAAG	deletion of PDR3
PDR5KO:ura3 Fwd	AGACCCTTTTAAGTTTTCGTATCCGCTCGTTCGAAAGACTTTAGACAAAATAGAATTTTGAATTTGGTTAAGAAAAGAAACTTACCAAGATGGACTTTTTCGGTTTCTTTGAAATTTTTTTGATTCG	deletion of PDR5
PDR5KO:ura3 Rev	TAGATGGCCACTGTGGCAGATGTATTGGAAATATCAGCTTGAGTCTTTAAGGGTAATAACTGATATAATTAAATTGAAG	deletion of PDR5
SNQ2KO:ura3 Fwd	AAAAAAGTGGATAGAATAACACAGCTACCAAAATACGTAAAGAGAATTCATGTGGGCTTCAGATAACTTAACATTTTGTGCATTCATCTGCCTTTAATTCCGGTTTCTTTGAAATTTTTTTGATTCG	deletion of SNQ2
SNQ2KO:ura3 Rev	ATAAATTGTAACAAAAGCGGTTGATTTCAATAAGTTTGTCATAATACGGAGGGTAATAACTGATATAATTAAATTGAAG	deletion of SNQ2
YOR1KO:ura3 Fwd	TATTACTGTTTTTATATTCAAAAAGAGTAAAGCCGTTGCTATATACGAATTTTATATTATTTGTTGCATGATTTTTCTCTTTTATTTATTTATATGTTGCCGGTTTCTTTGAAATTTTTTTGATTCG	deletion of YOR1
YOR1KO:ura3 Rev	TAAGGATATGAAAAACCCACCGAAAAAAATACCAATCCCAACTAAGGCAAGGGTAATAACTGATATAATTAAATTGAAG	deletion of YOR1
