# Supplementary figures and images for: A general strategy to construct small molecule biosensors in eukaryotes
Source: eLife journal article supplement (doi:10.7554/elife.10606), 2015-12-29

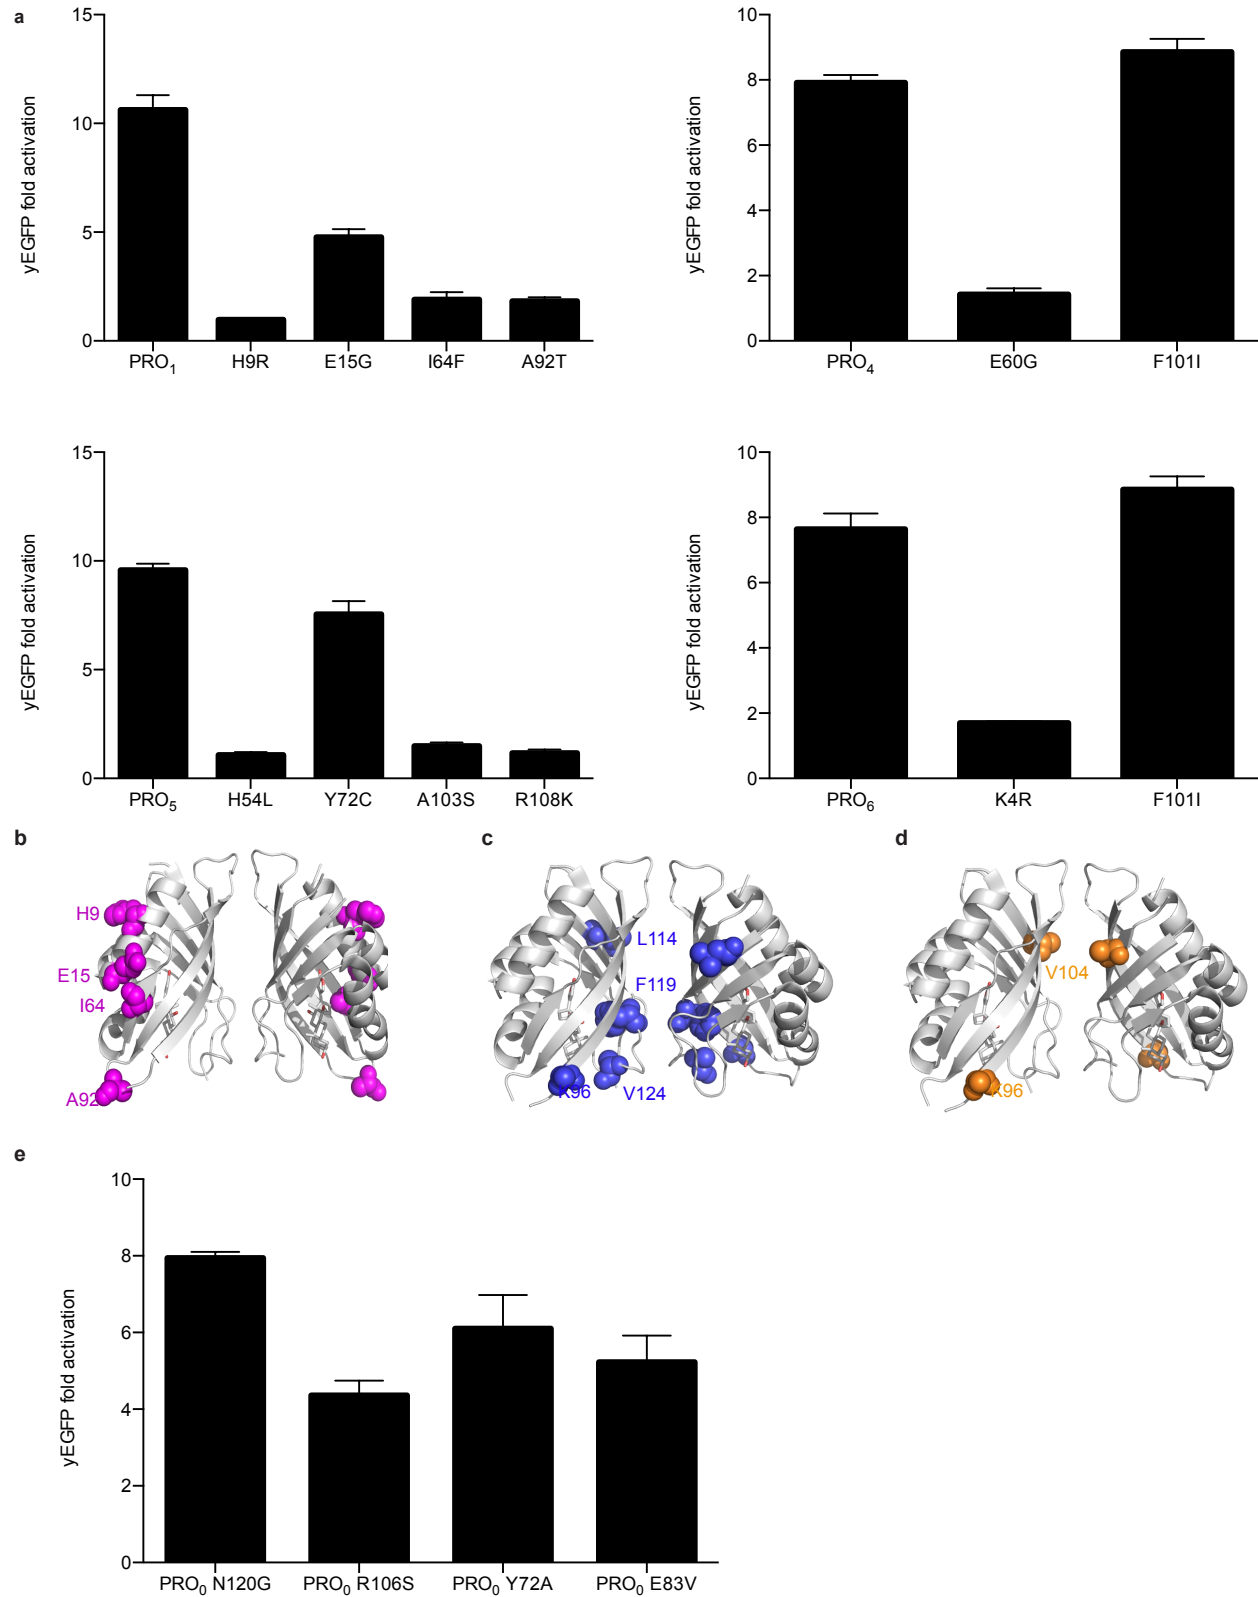

Supplement: supp [file elife-10606-supp-v1.zip]

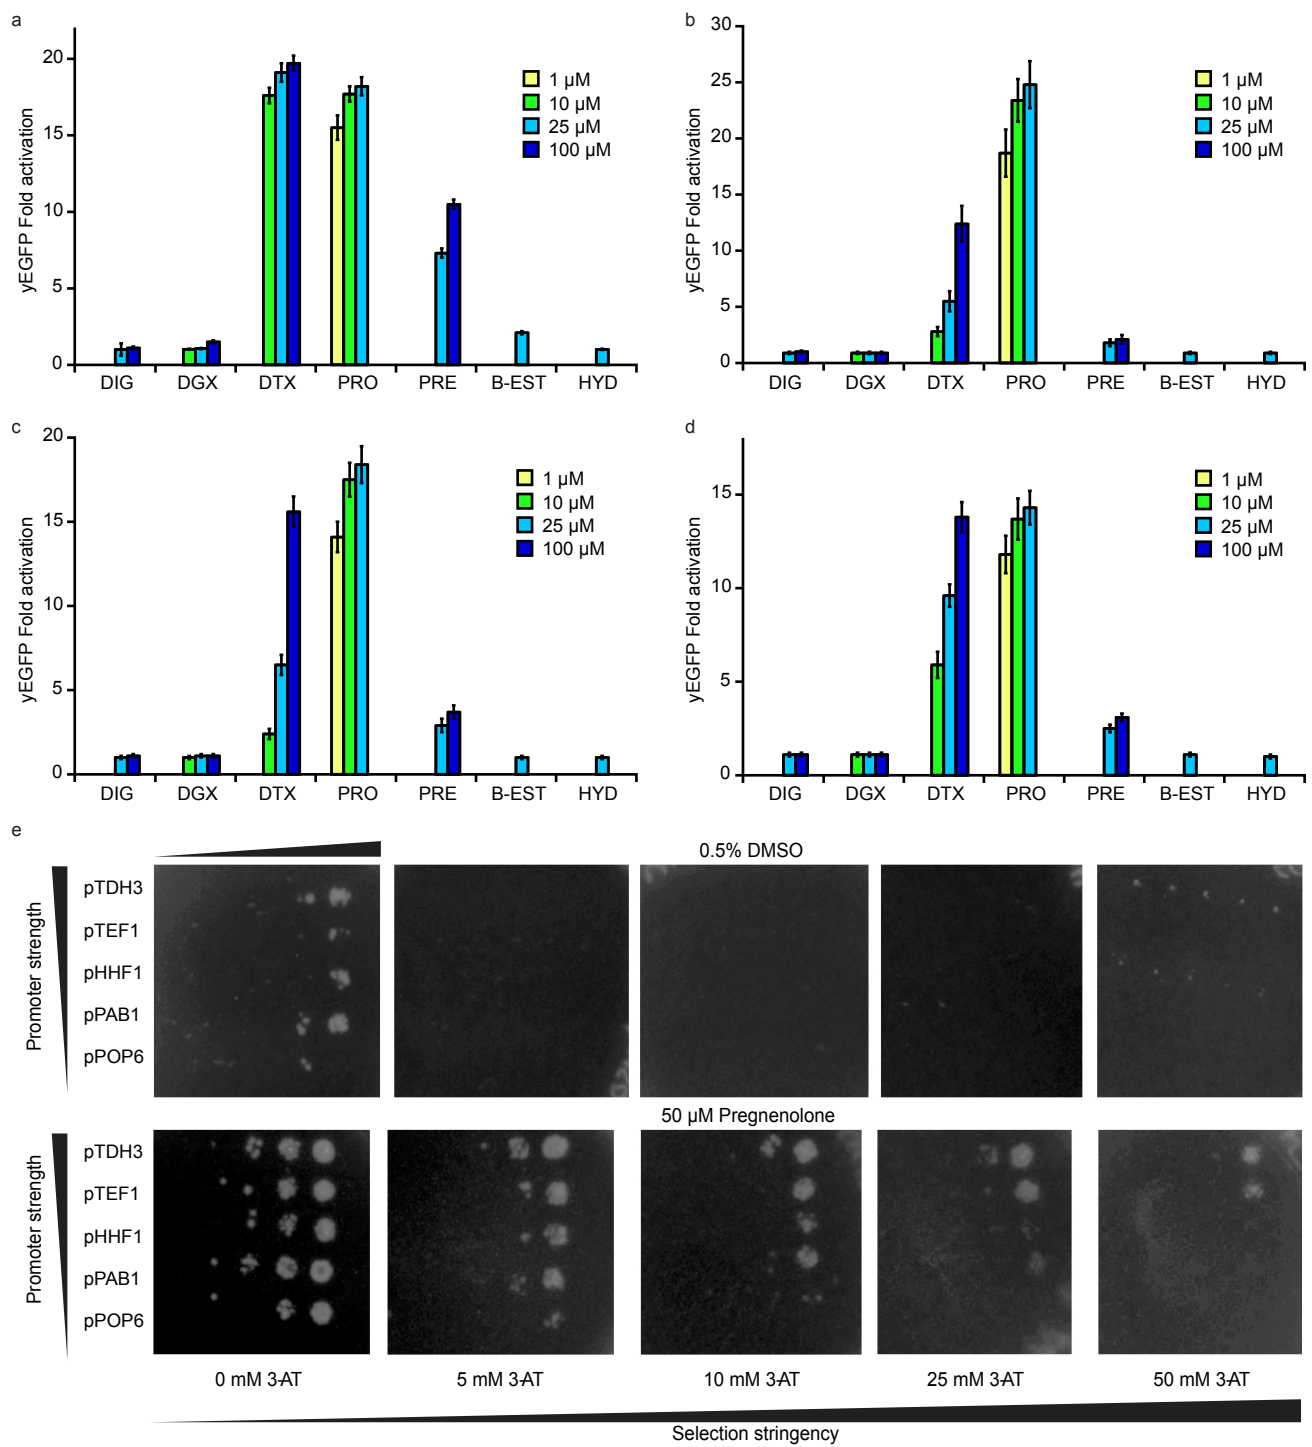

Supplement: supp [file elife-10606-supp-v1.zip]

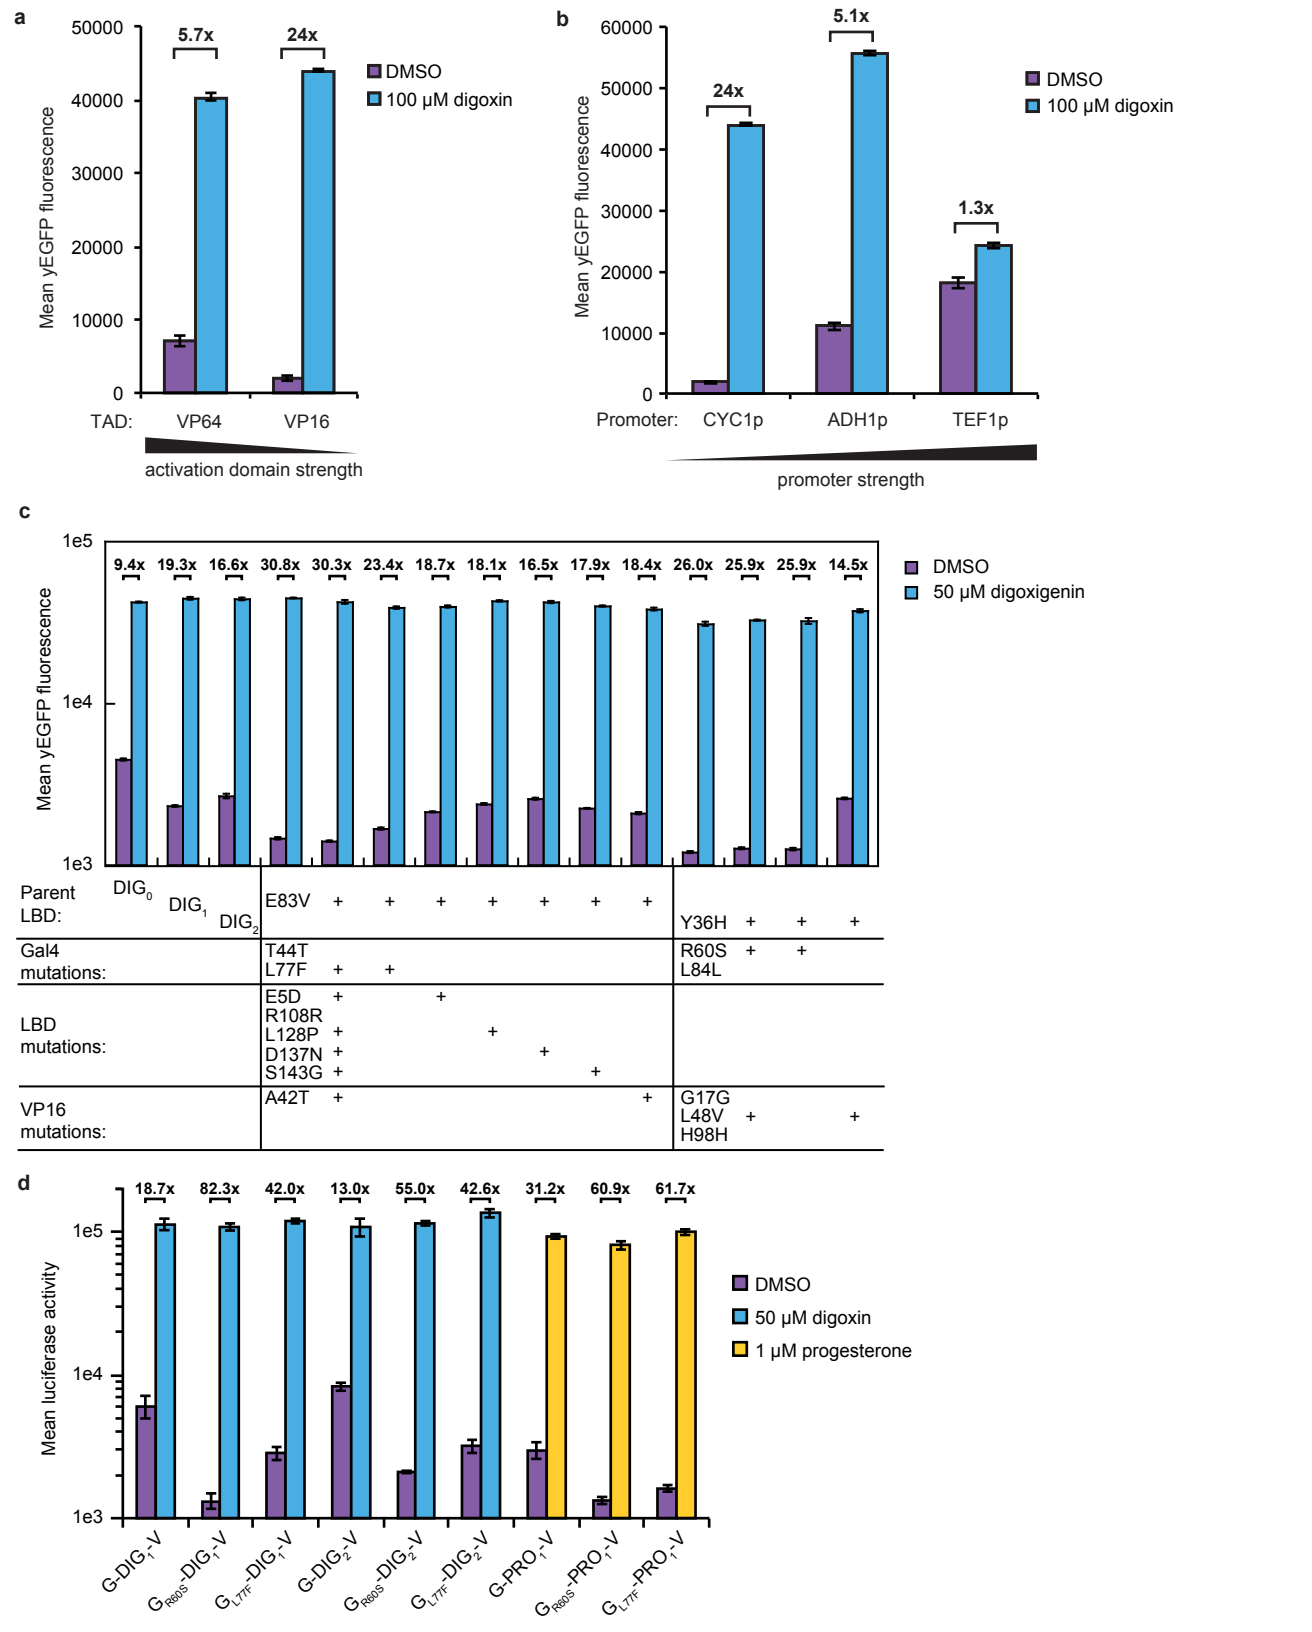

Supplement: supp [file elife-10606-supp-v1.zip]

**a**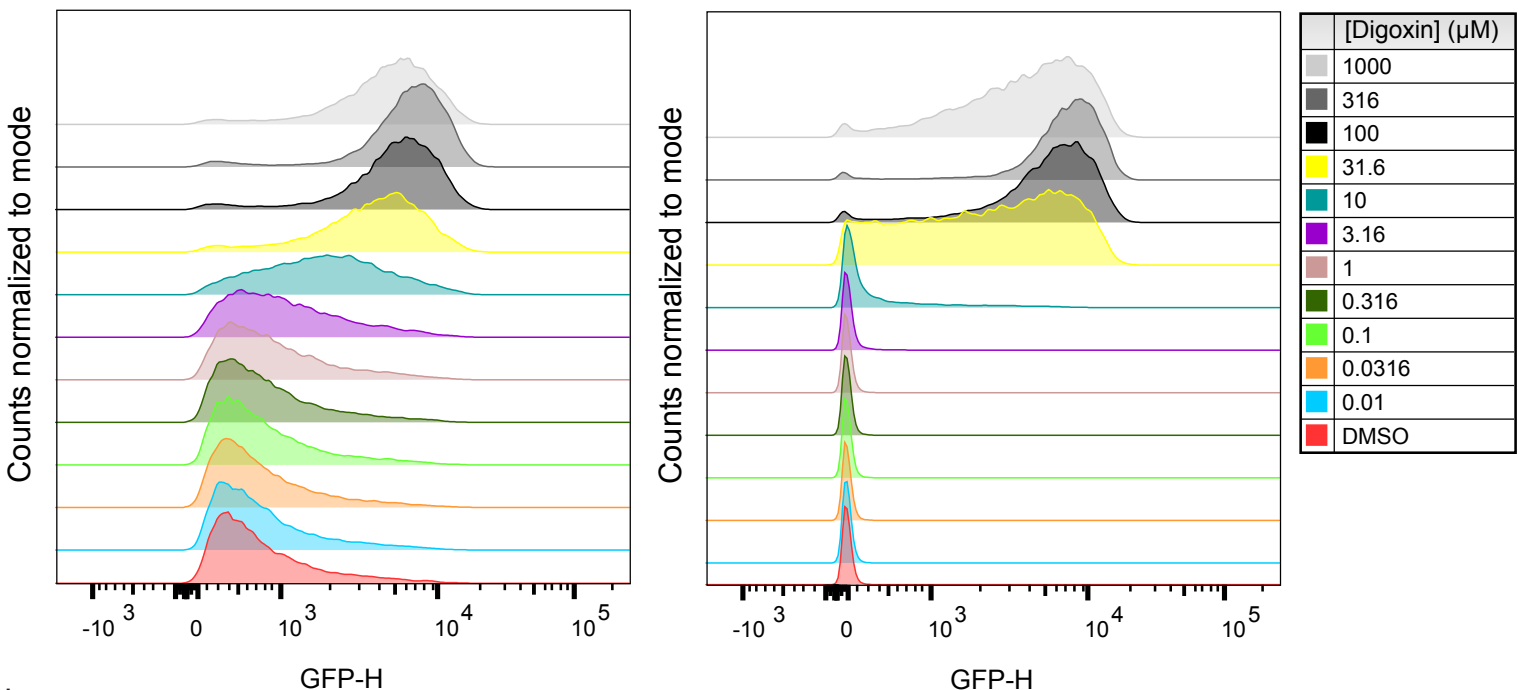**b**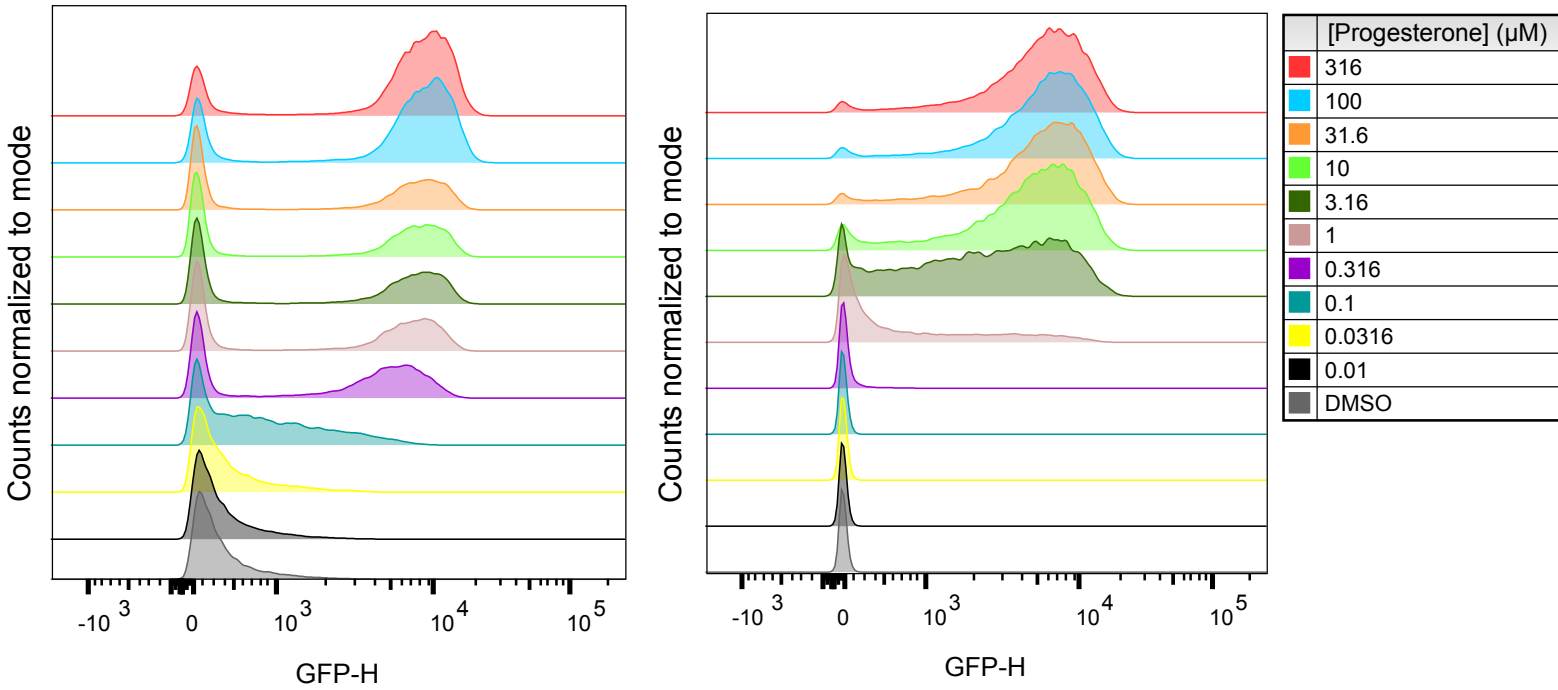

Supplement: supp [file elife-10606-supp-v1.zip]

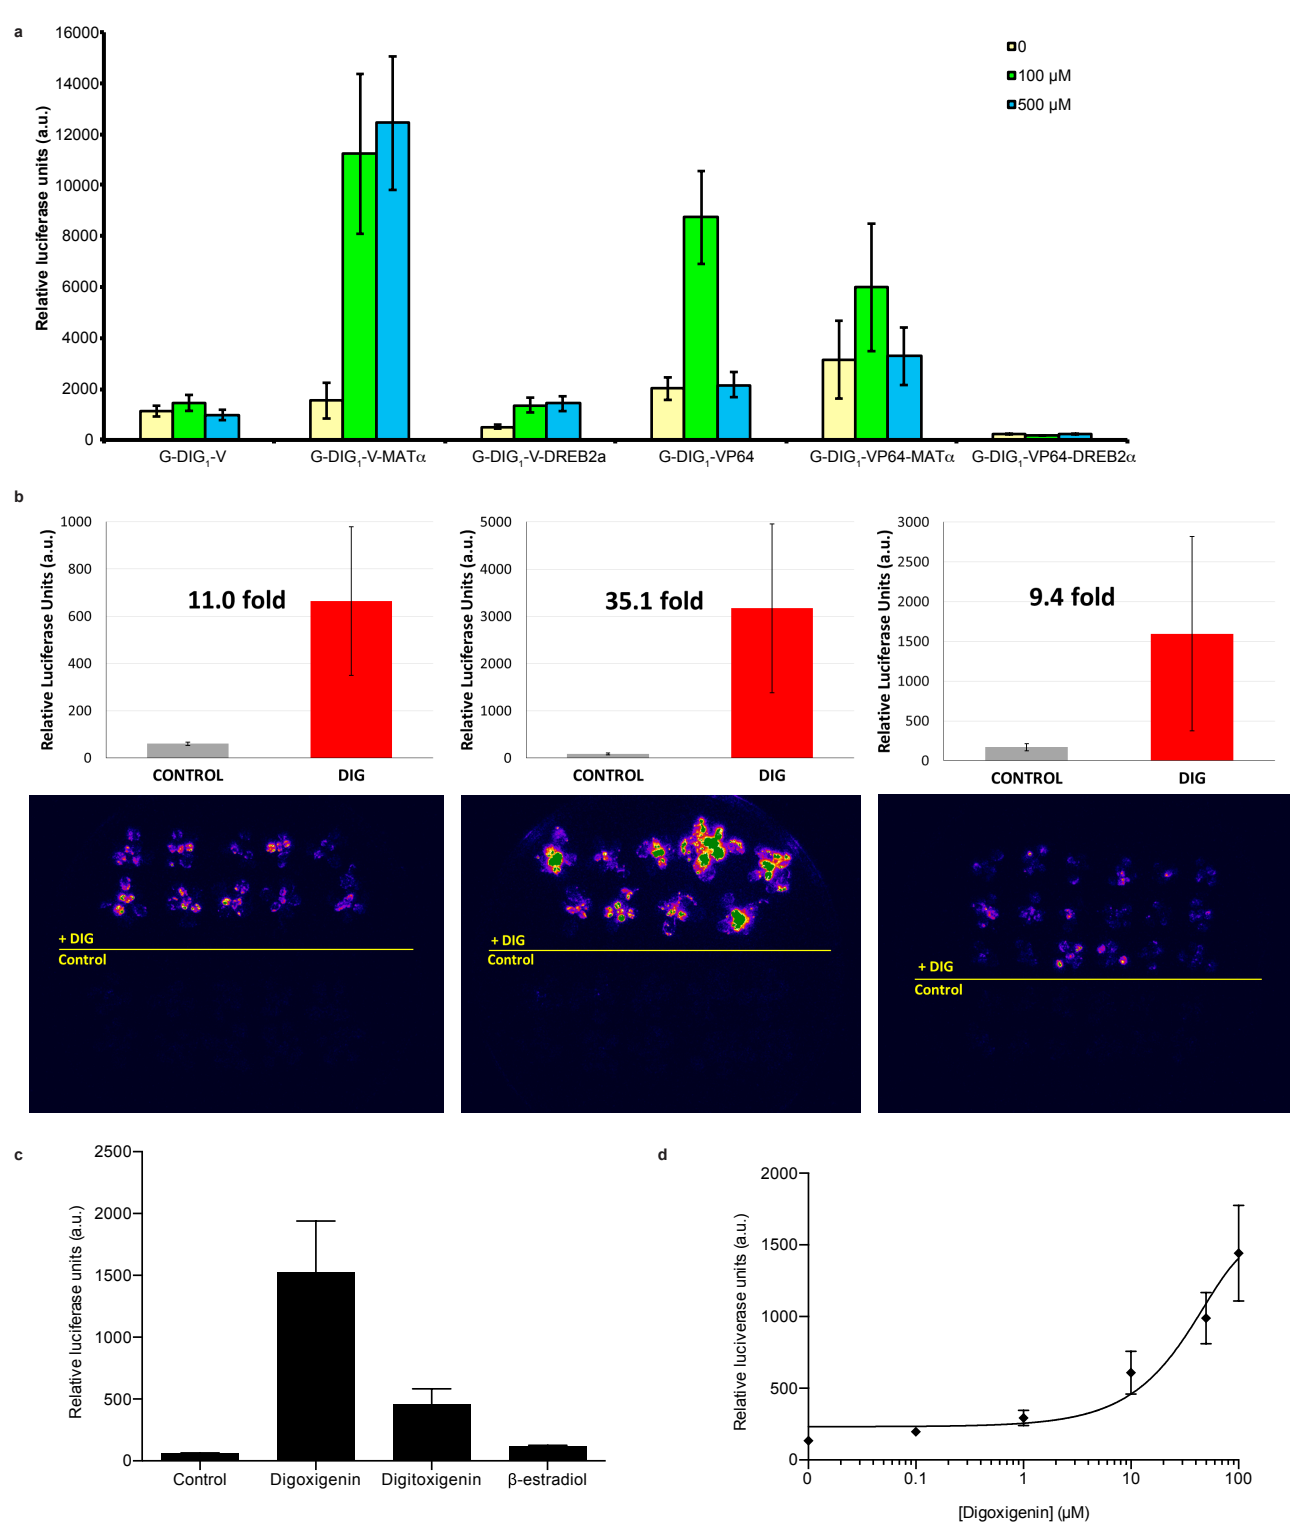

Supplement: supp [file elife-10606-supp-v1.zip]

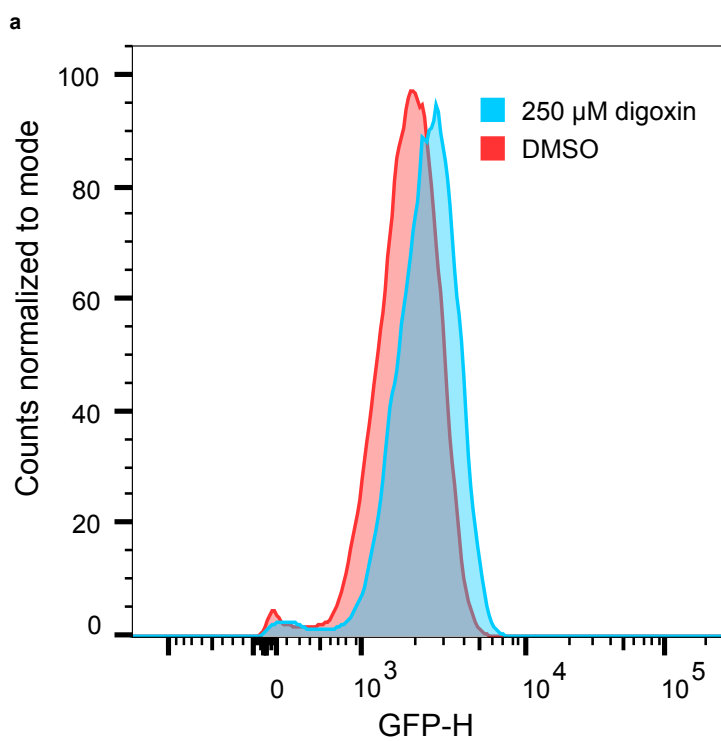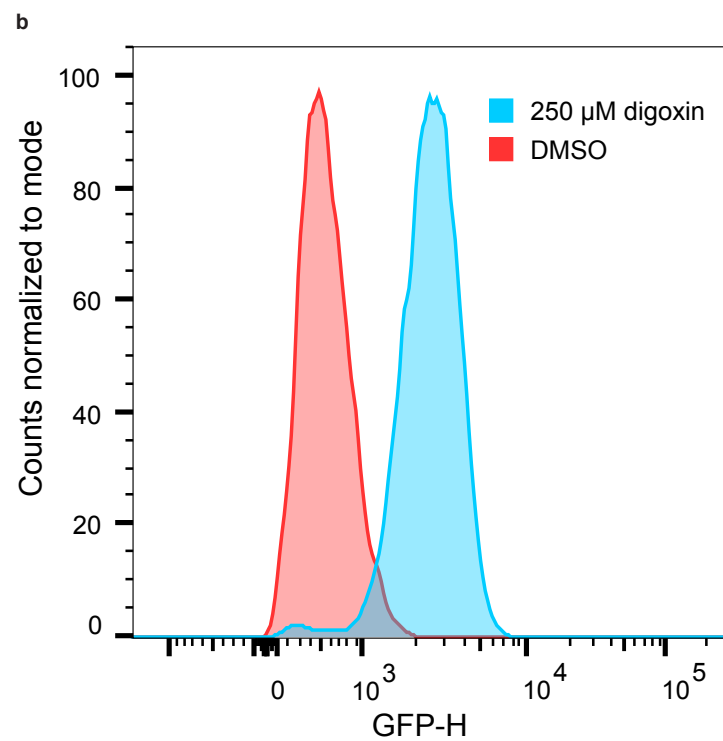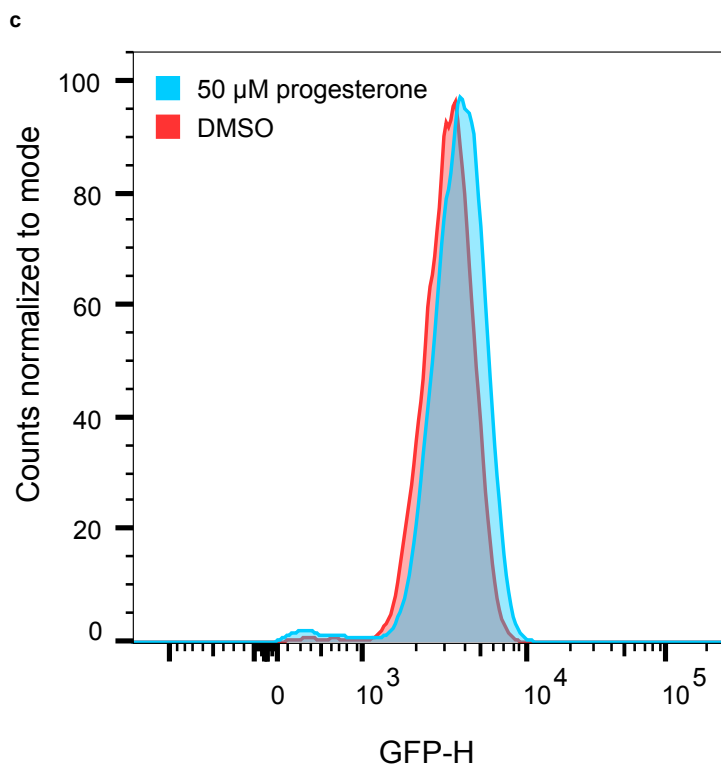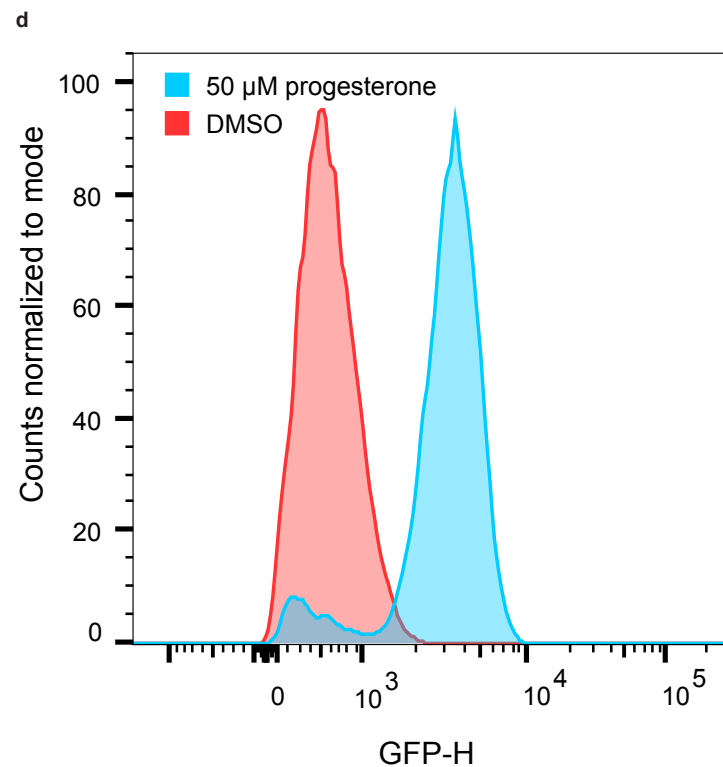

Supplement: supp [file elife-10606-supp-v1.zip]
